# Supplementary material for: VTensor: Using Virtual Tensors to Build a Layout-Oblivious AI Programming Framework
Source: Springer Nature journal article supplement (doi:10.1007/s11390-022-1457-6), 2023-09-01
Supplement: 11390_2022_1457_MOESM1_ESM.pdf [file 11390_2022_1457_MOESM1_ESM.pdf]

Yu F, Zhao JC, Cui HM *et al.* VTensor: Using virtual tensors to build a layout-oblivious AI programming framework. JOURNAL OF COMPUTER SCIENCE AND TECHNOLOGY 38(5): 1074–1097 Sept. 2023. DOI: 10.1007/s11390-022-1457-6

# VTensor: Using Virtual Tensors to Build a Layout-Oblivious AI Programming Framework

Feng Yu (俞 峰), Jia-Cheng Zhao (赵家程), Hui-Min Cui (崔慧敏),  
Xiao-Bing Feng (冯晓兵), Jingling Xue (薛京灵)

# Research Questions

## Q1. Poor Maintainability

```
The total number of lines of code to implement the MklAvgPoolingOp is about 500.
class MklAvgPoolingOp {
void Compute(OpKernelContext* ctx) {
  Tensor input = ctx->input(0);
  MklDnnShape shape;
  // Resolve the second input tensor to MklDnnShape and perform an
  // integrity check on the input tensor, which takes about 40 lines of code.
  ResolveAndCheckIntegrity(input, shape, ctx);

  // Extracts dimension information and attributes of AvgPool operator, which
  // takes up 190 lines.
  PoolParameters pool_params;
  ExtractPoolParameters(ctx, &pool_params, input, shape);

  // Infer output tensor shape, which takes up 30 lines.
  memory::dims output_dims_mkl_order;
  InferOutShape(pool_params, &output_dims_mkl_order);

  // The attributes and dimension information of operators are represented
  // by MKL-DNN data structure, which takes up 70 lines.
  memory::dims filter_dims, strides, padding_left, padding_right;
  PoolParamsToAttributes(&pool_params, &filter_dims, &strides,
    &padding_left, &padding_right, is_pool2d);
  memory::dims src_dims = shape.IsMklTensor() ? shape.GetSizesAsMklDims()
    : TFShapeToMklDnnDimsInNCHW(input, tf_format);
  memory::desc input_md = shape.IsMklTensor() ? shape.GetMklLayout()
    : memory::desc(src_dims, tf_format, ...);

  // Takes up 10 lines, Omit other parameters.
  MklPoolingParams fwdParams(src_dims, output_dims_mkl_order, filter_dims, ...);
  MklPoolingFwdPrimitive* pooling_fwd =
    MklPoolingFwdPrimitiveFactory::Get(fwdParams);

  // allocate output tensor, which takes up 90 lines.
  AllocateOutputTensor(0, out_tf_shape, output_tensor);
  AllocateMklShapeTensor(1, out_mkl_shape, shape_tensor);

  // Perform data conversion operations, occupying 70 lines.
  if (input_md.format != pooling_fwd->GetSrcMemoryFormat()) {
    CheckReorderToOpMem(input_md, required_layout);
  }
  // execute pooling
  pooling_fwd->Execute(src_data, output_tensor);
}
};
```

Fig.1. Layout-aware programming for AvgPool in TensorFlow (with the layout-dependent lines shown in red).

## Q2. Lost opportunity for layout optimization.

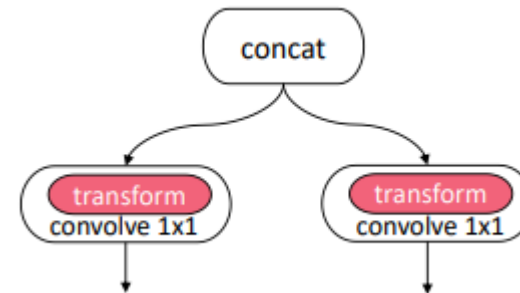

Fig.2. Layout conversion is done by operators, because the layout of the application can only be determined at runtime.

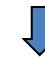

**Lost layout optimization opportunities, such as redundant layout transition operations. .**

**Library have layout conventions, while applications have no restrictions on layout, so a lot of layout-related code needs to be developed.**

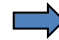

# Insights & Solution

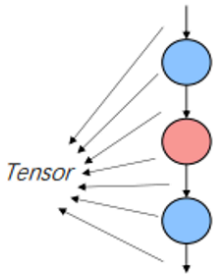

Adopt the idea of polymorphism in the object-oriented model !!

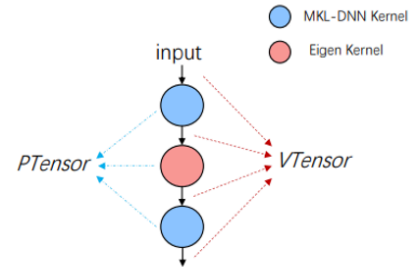

## Insights

### Virtual Tensor

The closer to the application, the developer is using the mathematical semantics of tensors.

Dynamic Resolver

### Physical Tensor

The closer to the library, the developer is using the physical semantics of tensors.

```

The total number of lines of code to implement the MklAvgPoolingOp is about 500.
class MklAvgPoolingOp {
void Compute(OpKernelContext* ctx) {
  Tensor input = ctx->input(0);
  MKLDnnShape shape;
  // Resolve the second input tensor to MklDnnShape and perform an
  // integrity check on the input tensor, which takes about 40 lines of code.
  ResolveAndCheckIntegrity(input, shape, ctx);
  // Extracts dimension information and attributes of AvgPool operator, which
  // takes up 190 lines.
  PoolParameters pool_params;
  ExtractPoolParameters(ctx, &pool_params, input, shape);
  // Infer output tensor shape, which takes up 30 lines.
  memory::dims output_dims_mkl_order;
  InferOutShape(pool_params, &output_dims_mkl_order);
  // The attributes and dimension information of operators are represented
  // by MKL-DNN data structure, which takes up 70 lines.
  memory::dims filter_dims, strides, padding_left, padding_right;
  PoolParamsToAttributes(&pool_params, &filter_dims, &strides,
    &padding_left, &padding_right, is_pool2d);
  memory::dims src_dims = shape.IsMklTensor() ? shape.GetSizeAsMKLDims()
    : TFShapeToMklDnnDimsInNCHW(input, tf_format);
  memory::desc input_md = shape.IsMklTensor() ? shape.GetMklLayout()
    : memory::desc(src_dims, tf_format, -);
  // Takes up 10 lines, Omit other parameters.
  MklPoolingParams fwdParams(src_dims, output_dims_mkl_order, filter_dims, -);
  MklPoolingFwdPrimitive* pooling_fwd =
    MklPoolingFwdPrimitiveFactory::Get(fwdParams);
  // allocate output tensor, which takes up 90 lines.
  AllocateOutputTensor(0, out_tf_shape, output_tensor);
  AllocateMklShapeTensor(1, out_mkl_shape, shape_tensor);
  // Perform data conversion operations, occupying 70 lines.
  if (input_md.format != pooling_fwd->GetSrcMemoryFormat()) {
    CheckReorderToOpMem(input_md, required_layout);
  }
  // execute pooling
  pooling_fwd->Execute(src_data, output_tensor);
};
    
```

```

The total number of lines of code for the AvgPoolOp class and the mklDnnAvgPoolInvoker
function is 140.
class AvgPoolOp {
void Compute(OpKernelContext* ctx) {
  VTensor input = context->input(0);
  // Extracting parameters required by the AvgPool operator, which takes about 50 lines.
  VPoolParameters param;
  ExtractPoolParametersFromVTensor(ctx, &param, input);
  // Infer output tensor shape, which takes up 20 lines.
  InferOutShape(&param);
  // Allocate output tensor. The settings of other dimension names and sizes are omitted.
  VTensorOptions* vto(ctx, 0/*output index*/);
  VTensor* output_tensor = new VTensor({{'N', param.batch_size, -}, vto);
  Dispatcher(ctx, {input}, {output_tensor}, &param);
}
void Dispatcher(OpKernelContext* ctx, vector<VTensor> input,
  vector<VTensor*> output, Parameters* param) {
  ParametersAndDimensionCheck(ctx, input, output, param);
  auto invoker_dict = getDeviceInvokers(ctx->device());
  for (int priority = highest_priority; priority >= lowest_priority; priority--) {
    Invoker* invoker = invoker_dict.getInvoker(priority);
    if (invoker) { invoker(ctx, input, output, param); return; }
  }
};
REGISTER(CPUDevice, "AvgPool", mklDnnAvgPoolInvoker)
void mklDnnAvgPoolInvoker(OpKernelContext* ctx, vector<VTensor> input,
  vector<VTensor*> output, Parameters* param) {
  // Use VTensor to construct PTensor, the output PTensor is omitted here.
  PTensor* in_p = new VTensor(input[0]);
  LAYOUT p_layout = GetLibGuideline("MKLDNN", in_p);
  in_p->require(p_layout);
  if (LibTagger("MKLDNN", {in_p}, {out_p}) return;
  MemoryDesc in_desc = in_p->getLibraryDesc("MKLDNN");
  MemoryDesc out_desc = out_p->getLibraryDesc("MKLDNN");
  // Converts information such as attributes and dimensions into data structures
  // acceptable to the MKL-DNN library, which takes up 40 lines.
  MklPoolingParams fwdParams;
  ConstructMklPoolParams(param, fwdParams, in_desc, out_desc);
  MklPoolingFwdPrimitive* pooling_fwd
    = MklPoolingFwdPrimitiveFactory::Get(fwdParams);
  pooling_fwd->Execute(in_p->data(), out_p->data());
}
    
```

Fig.1. Layout-aware programming for AvgPool in TensorFlow (with the layout-dependent lines shown in red).

Fig.3. Layout-oblivious programming for AvgPool in VTensor (blue lines are auto-generated, orange lines are VTensor API calls).

# Design and Experimentation

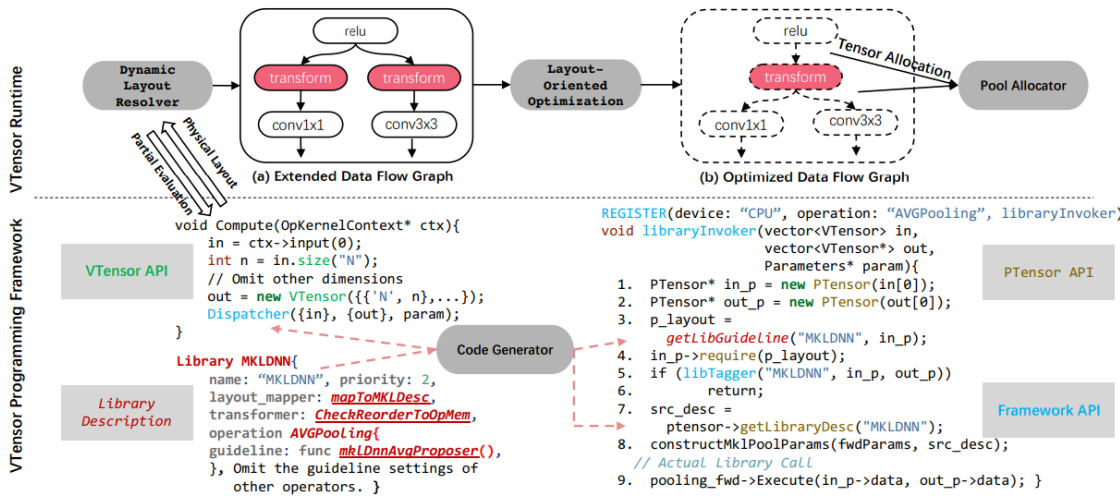

Fig.4. The VTensor framework overview.

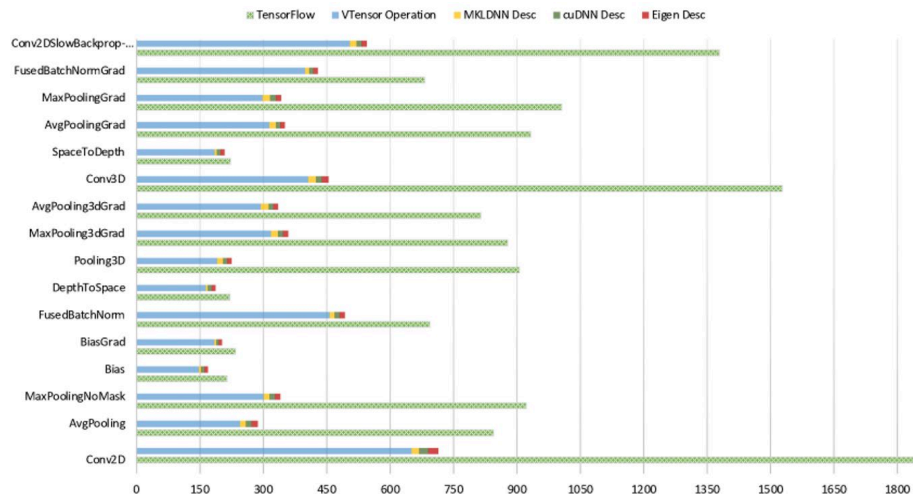

Fig.5. Comparison of LOC when writing an operator using VTensor/TensorFlow framework.

## Experimental results:

- VTensor can **reduce the LOC** of writing a new operation by **47.82%** on average.
- VTensor **improve the overall performance** by **18.65%**, on average.

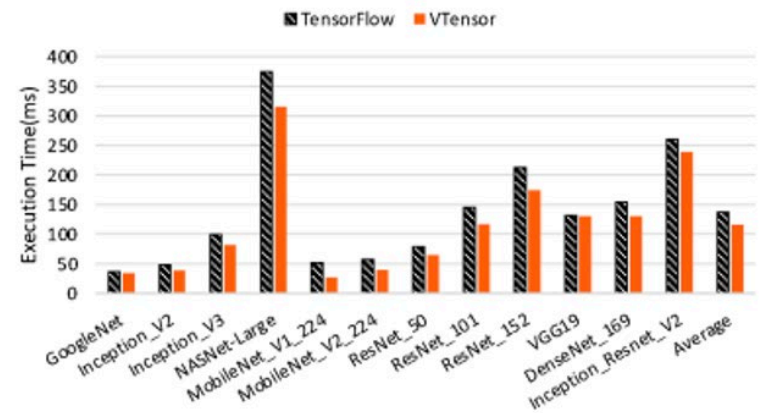

Fig.6. Inference latency of TensorFlow/VTensor on CPU platform.

# Conclusions

- The library has a convention on the layout but the application has no restrictions, resulting in the following problems:
  - Poor Maintainability
  - Lost opportunity for layout optimization.
- Insight: The application layer uses the mathematical semantics of tensors, while the library uses the physical semantics of tensors.
  - Use the idea of polymorphism
- Contribution
  - Propose a new programming abstraction that decouples operator developers from tensor layouts.
  - Propose a new layout parsing mechanism for automatically mapping virtual tensors to physical tensors.
  - Taking advantage of the fact that VTensor layout resolution happens at runtime, uncovers new opportunities for layout optimization.

# Conclusions

- Experimental results
  - VTensor can reduce the LOC of writing a new operation by 47.82% on average.
  - VTensor improve the overall performance by 18.65%, on average.
- Future work
  - Modify the layout optimization algorithm with the goal of minimizing layout transition time.
  - Abstracts the layout of sparse tensors and integrates the VTensor idea into the compiler as an intermediate representation.
